# Supplementary material for: Global impact of nitrate photolysis in sea-salt aerosol on NO x , OH, and O 3 in the marine boundary layer
Source: Copernicus journal article supplement (doi:10.5194/acp-2018-303), 2018-05-07
Supplement: Supplementary file 1 [file acp-2018-303-supplement.pdf]

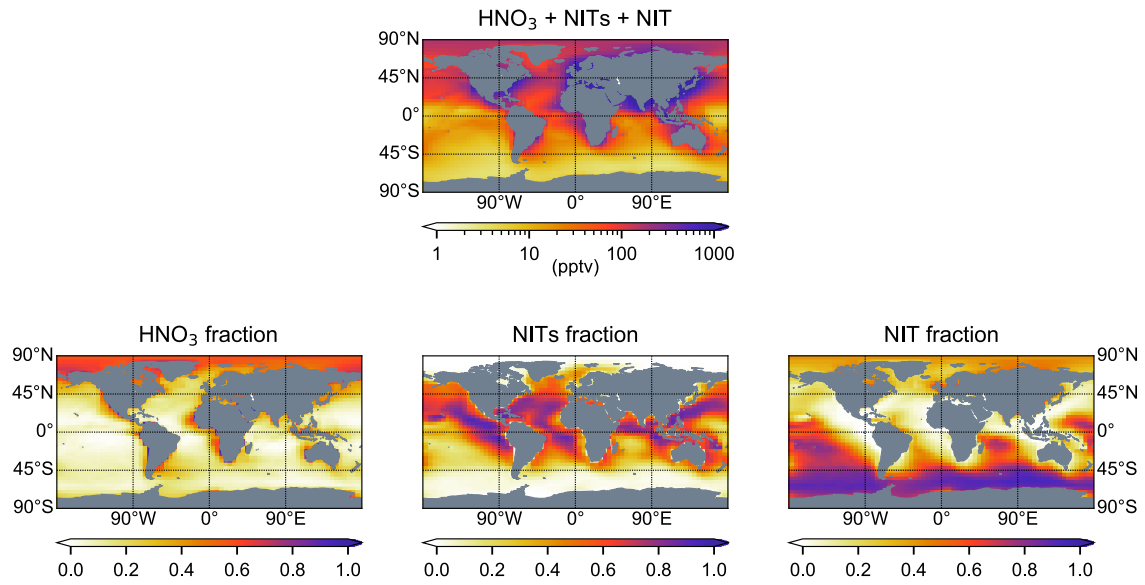

5 Figure S1: Simulated 2014-2015 boundary layer-average (average over bottom 1 km) total gas- and aerosol-phase nitrate (top panel), and fraction of total that is in the gas-phase (bottom left panel), in coarse-mode SSA (bottom middle panel), and in accumulation-mode aerosol (bottom right panel) for the updated model.

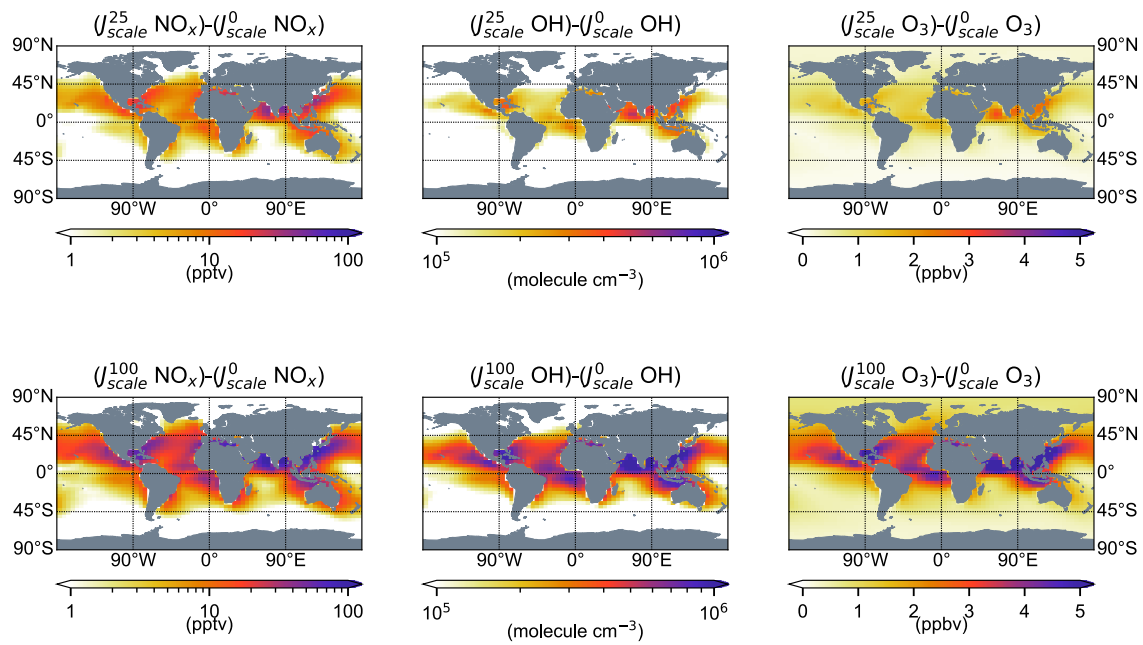

Figure S2: Simulated increases in 2014-2015 MBL-average (average over bottom 1 km)  $NO_x$  (left panels), OH (middle panels) and  $O_3$  (right panels) for the  $J_{scale}^{25}$  (top panels) and  $J_{scale}^{100}$  (bottom panels) model runs relative to the  $J_{scale}^0$  model run.
